# Supplementary material
Source: PubMed Central journal article supplement (PMC4807292)
Supplement: 10.1074_M115.690875_jbc.M115.690875-1.pdf [file 10.1074_M115.690875_jbc.M115.690875-1.pdf]

Supplement Figure 1

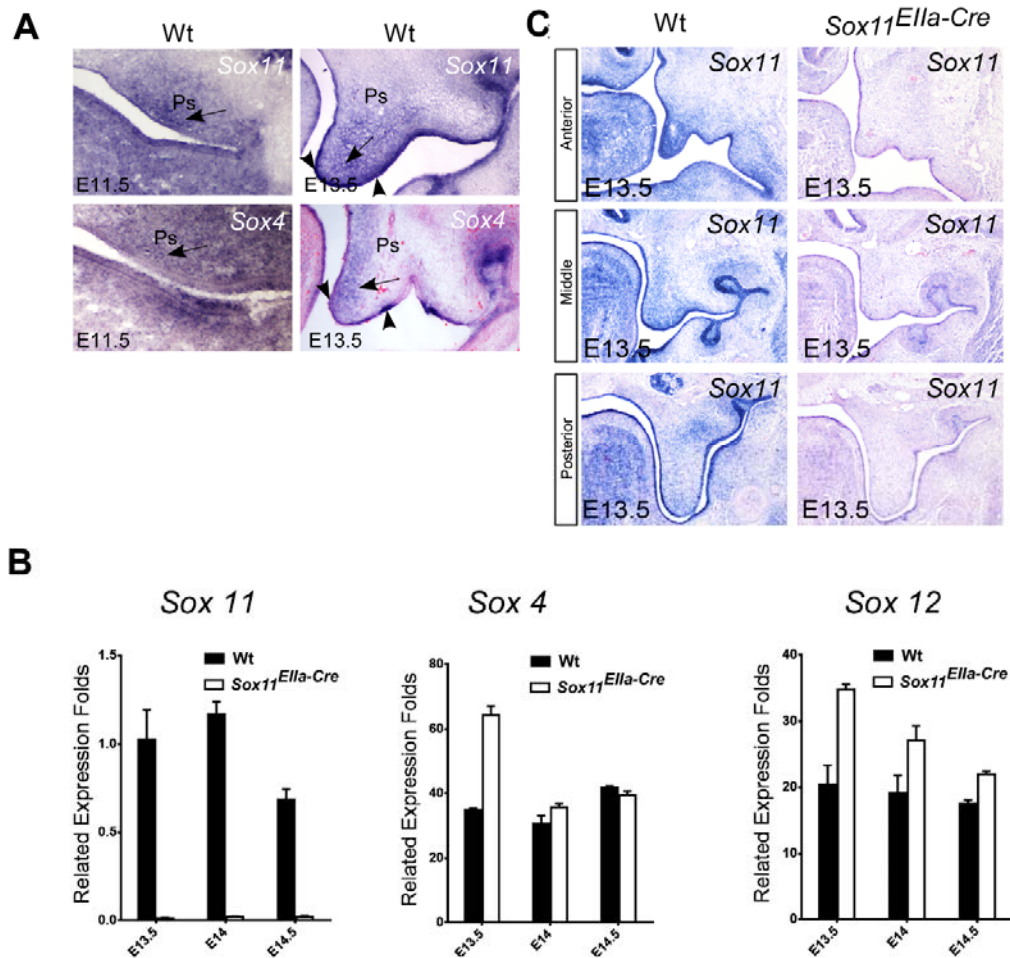

Supplemental Figure 1. *Sox11* deletion increased the expression of *Sox4* and *Sox12* in the developing palatal shelf. (A) In situ hybridization shows that the localizations of *Sox4* and *Sox11* transcripts overlap in both the epithelium (arrowheads) and the mesenchyme (arrows) of the palatal shelves at E11.5 and E13.5. Ps: palatal shelf. (B) Quantitative real-time RT PCR shows that *Sox11* is deleted completely in E13.5, E14.0 and E14.5 palatal shelves in *Sox11<sup>Ella-Cre</sup>*, whereas the expression levels of *Sox4* and *Sox12* are increased. (C) In situ hybridization shows that *Sox11* is deleted completely in anterior, middle and posterior of palatal shelves in *Sox11<sup>Ella-Cre</sup>*.
