# Supplementary material
Source: PubMed Central journal article supplement (PMC4807292)
Supplement: 10.1074_M115.690875_jbc.M115.690875-2.pdf [file 10.1074_M115.690875_jbc.M115.690875-2.pdf]

Supplement Figure 2

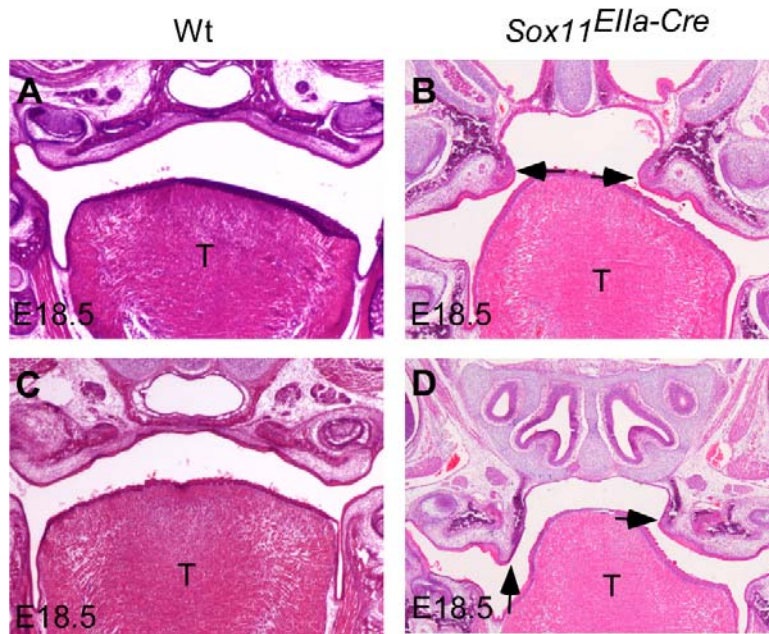

Supplemental Figure 2. Elevation of palatal shelves occurs in a late embryonic stage. (A-D) Elevation of either two sides (B) or one side of the palatal shelves occurs in the Sox11Ella-Cre mutant at E18.5. Horizontal arrows point to the elevation (B and D). T: Tongue.
